# Supplementary material for: Electrospinning preparation and high near-infrared temperature sensing performance of one-dimensional Y2Ti2O7:Cr3+/Yb3+ nano wire-embedded-tube structures with low Cr3+ concentrations
Source: Royal Society of Chemistry journal article supplement (doi:10.1039/d3tc01658g), 2023-01-01
Supplement: d3tc01658g1.pdf [file d3tc01658g1.pdf]

# Supporting Information

## **Electrospinning preparation and high near-infrared temperature sensing performance of one-dimensional $\text{Y}_2\text{Ti}_2\text{O}_7:\text{Cr}^{3+}/\text{Yb}^{3+}$ nano wire-embedded-tube structures with low $\text{Cr}^{3+}$ concentrations**

Zhanwen Han, Hongquan Yu\*, Xiao Gao, Baojiu Chen, Jiashi Sun\*

Department of Physics, Dalian Maritime University, Dalian 116026, Liaoning, China

\*Corresponding author: **Hongquan Yu and Jiashi Sun**

Address: No. 1, Linghai Road, Dalian 116026, Liaoning, P.R. China

E-mail: yuhq7808@126.com (H. Yu); sunjs@dlnu.edu.cn (J. Sun)

Tel/ Fax: +86-411-84728909

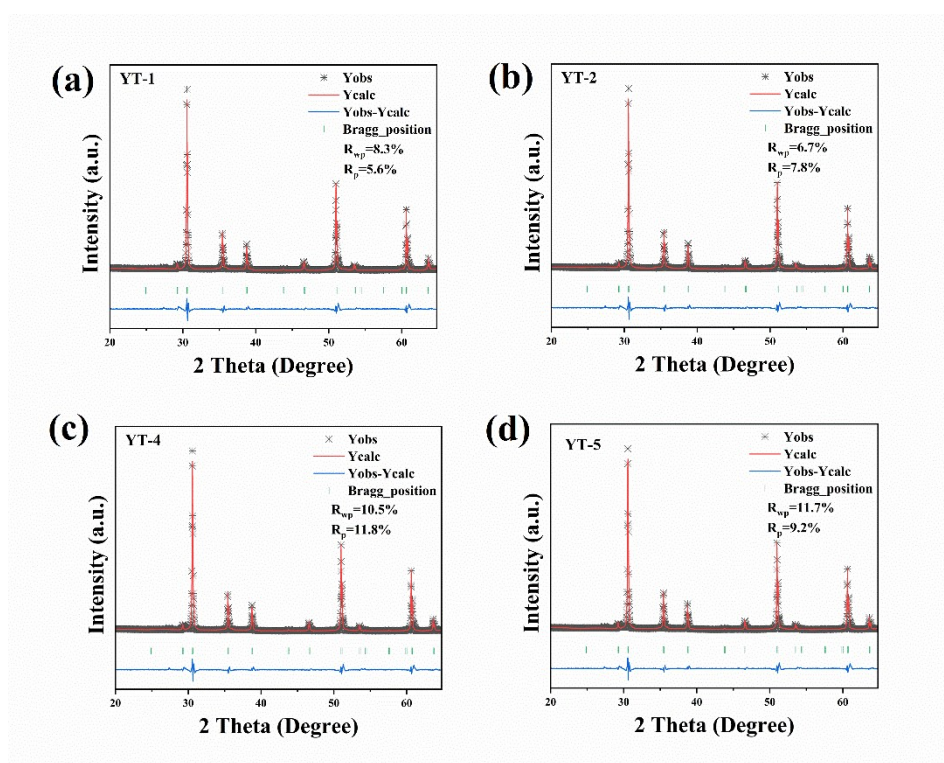

**Fig. S1.** Rietveld refinement of YT-1, YT-2, YT-4 and YT-5.

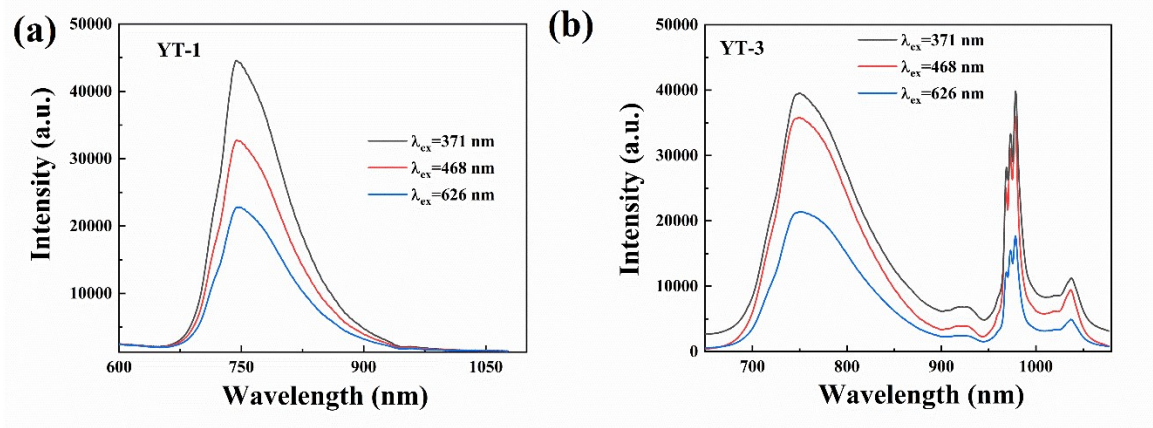

**Fig. S2.** The emission spectra of YT-1 and YT-3 under 371 nm, 468 nm and 626 nm excitation.

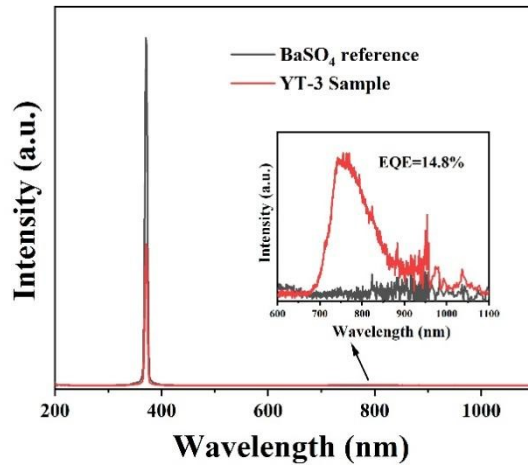

**Fig. S3.** The EQE (600-1100 nm) of YT-3 sample under 371 nm excitation.

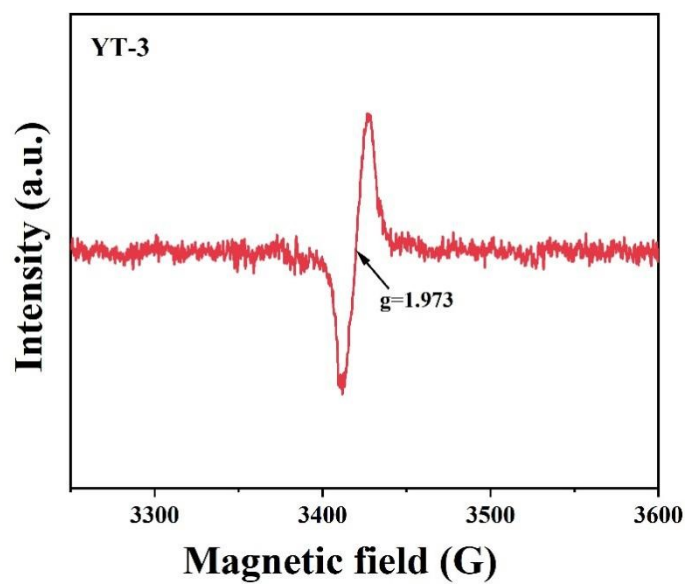

**Fig. S4.** EPR spectrum of YT-3 (oxygen vacancies are measured directly at room temperature).

**Table S1.** Rietveld refinement results of the YT-1, YT-2, YT-3, YT-4 and YT-5 samples.

| <b>Formula</b>                    | <b>YT-1</b>                                      | <b>YT-2</b>                                      | <b>YT-3</b>                                      | <b>YT-4</b>                                       | <b>YT-5</b>                                      |
|-----------------------------------|--------------------------------------------------|--------------------------------------------------|--------------------------------------------------|---------------------------------------------------|--------------------------------------------------|
|                                   | Cu K $\alpha$                                    | Cu K $\alpha$                                    | Cu K $\alpha$                                    | Cu K $\alpha$                                     | Cu K $\alpha$                                    |
| <b>Radiation type</b>             | radiation with $\lambda$<br>= 1.5406 Å            | radiation with $\lambda$<br>= 1.5406 Å           |
| <b>2<math>\theta</math> range</b> | 20-65°                                           | 20-65°                                           | 20-65°                                           | 20-65°                                            | 20-65°                                           |
| <b>Symmetry</b>                   | Cubic                                            | Cubic                                            | Cubic                                            | Cubic                                             | Cubic                                            |
| <b>Space group</b>                | Fd-3 m (227)                                     | Fd-3 m (227)                                     | Fd-3 m (227)                                     | Fd-3 m (227)                                      | Fd-3 m (227)                                     |
| <b>Cell parameters</b>            | a= 10.0998 (2)<br>b=10.0998 (2)<br>c=10.0998 (2) | a= 10.1221 (2)<br>b=10.1221 (2)<br>c=10.1221 (2) | a= 10.1224 (2)<br>b=10.1224 (2)<br>c=10.1224 (2) | a= 10.1228 (2)<br>b=10.1228 (2)<br>c=10.1228 (2)  | a= 10.1231 (2)<br>b=10.1231 (2)<br>c=10.1231 (2) |
|                                   | $\alpha = \beta = \gamma =$<br>90°                | $\alpha = \beta = \gamma =$<br>90°               |
| <b>Reliability factors</b>        | R <sub>wp</sub> = 8.5%<br>R <sub>p</sub> = 5.6%  | R <sub>wp</sub> = 6.7%<br>R <sub>p</sub> = 7.8%  | R <sub>wp</sub> = 3.65%<br>R <sub>p</sub> = 2.2% | R <sub>wp</sub> = 10.5%<br>R <sub>p</sub> = 11.8% | R <sub>wp</sub> = 11.7%<br>R <sub>p</sub> = 9.2% |

**Table S2.** Spectroscopic parameters of Cr<sup>3+</sup> ions in various crystals. Dq is the crystal field splitting, B and C are the Racah parameters. E(<sup>2</sup>E<sub>g</sub>) is energy of the Cr<sup>3+</sup> <sup>2</sup>E<sub>g</sub> level.

| Host material                                 | Dq/B | B/cm <sup>-1</sup> | C/cm <sup>-1</sup> | C/B  | E( <sup>2</sup> E <sub>g</sub> ) energy/<br>cm <sup>-1</sup> | Ref.      |
|-----------------------------------------------|------|--------------------|--------------------|------|--------------------------------------------------------------|-----------|
| Cs <sub>2</sub> NaAlF <sub>6</sub>            | 2.37 | 695                | 3180               | 4.58 | 15270                                                        | S1        |
| K <sub>2</sub> LiAlF <sub>6</sub>             | 2.29 | 702                | 3358               | 4.78 | 15221                                                        | S2        |
| K <sub>2</sub> NaScF <sub>6</sub>             | 1.97 | 794                | 3231               | 4.07 | 15390                                                        | S3        |
| KMgF <sub>3</sub>                             | 1.91 | 760                | 3426               | 4.51 | 15734                                                        | S4        |
| KZnF <sub>3</sub>                             | 1.81 | 713                | 3211               | 4.50 | 15113                                                        | S5        |
| MgF <sub>2</sub>                              | 2.90 | 516                | 3797               | 7.36 | 15267                                                        | S6        |
| Al <sub>2</sub> O <sub>3</sub>                | 2.60 | 640                | 3300               | 5.16 | 14663                                                        | S7        |
| CaYAlO <sub>4</sub>                           | 2.54 | 705                | 2750               | 3.9  | 13475                                                        | S8        |
| CdWO <sub>4</sub>                             | 1.82 | 777                | 3428               | 4.41 | 15823                                                        | S9        |
| Ga <sub>2</sub> O <sub>3</sub>                | 3.15 | 529                | 3413               | 6.45 | 14286                                                        | S10       |
| $\alpha$ -Ga <sub>2</sub> O <sub>3</sub>      | 2.97 | 552                | 3382               | 6.13 | 14343                                                        | 71        |
| $\beta$ -Ga <sub>2</sub> O <sub>3</sub>       | 2.58 | 641                | 3187               | 4.97 | 14343                                                        | 71        |
| LaMgAl <sub>11</sub> O <sub>19</sub>          | 2.90 | 603                | 3882               | 6.44 | 14451                                                        | S11       |
| LiIn(WO <sub>4</sub> ) <sub>2</sub>           | 2.56 | 534                | 3294               | 6.17 | 13890                                                        | S12       |
| MgAl <sub>2</sub> O <sub>4</sub>              | 3.35 | 553                | 3416               | 6.18 | 14492                                                        | S13       |
| Y <sub>2</sub> Ti <sub>2</sub> O <sub>7</sub> | 2.59 | 604                | 3012               | 4.97 | 15625                                                        | This work |

Reference

- S1. J. L. Huang, X. Y. Kuang and Y. Li, Chem. Phys. Lett., 2008, **458**, 227.
- S2. A. M. Reisz, M. G. Brik, C. N. Avram, and N. M. Avram, Physica B, 2010, **405**, 1244.
- S3. J. F. Dolan, A. G. Rinzler, L. A. Kappers and R. H. Bartram, J. Phys. Chem. Solids, 1992, **905**, 905-912.
- S4. M. G. Brik, N. M. Avram and I. Tanaka, Phys. Stat. Sol. B, 2004, **241**, 2982.
- S5. P. T. C. Freire, O. Pilla and V. Lemos, Phys. Rev. B, 1994, **49**, 9232.
- S6. R. Nistora, L. Andreici and N. M. Avram, Acta Physica Polon. A, 2009, **116**, 538.
- S7. G. J. Wang, X. F. Long, L. Z. Zhang, G. F. Wang, S. Polosan and T. Tsuboi, J.Lumin., 2008, **128**, 1556.
- S8. M. Yamaga, P. I. Macfarlane, K. Holliday, B. Henderson, N. Kodama and Y. Inoue, J. Phys.: Condens. Matter, 1996, **8**, 3487.
- S9. G. J. Wang, L. Z. Zhang, Z. B. Lin and G. F. Wang, J. Alloys Compds., 2010, **489**, 293.
- S10. Y. H. Wang, K. Xu, D. R. Li, H. Zhao and Z. F. Hu, Opt. Mater., 2014, **36**, 1798.
- S11. V. Singh, G. Sivaramaiah, J. L. Rao and S. H. Kim, Mater. Res. Bull., 2014, **60**, 397.
- S12. K. Hermanowicz, J. Phys.: Condens. Matter, 2006, **18**, 10601.
- S13. A. R. Molla, C. R. Kesavulu, R. P. S. Chakradhar, A. Tarafder, S. K. Mohanty, J. L. Rao, B. Karmakar and S. K. Biswas, J. Alloys Compds., 2014, **583**, 498.
